# Supplementary material for: Exploring a high-level programming model for the NWP domain using ECMWF microphysics schemes
Source: Copernicus journal article supplement (doi:10.5194/gmd-2024-92), 2024-06-03
Supplement: Supplementary file [file gmd-2024-92-AC1-supplement.pdf]

**gmd-2024-92**

## **Exploring a high-level programming model for the NWP domain using ECMWF microphysics schemes**

by S. Ubbiali et al.

We thank the three reviewers for their constructive comments, which help us to further improve the manuscript. Below we provide a one-to-one response to all points raised by the reviewers. The reviewers' comments are in gray italics and our replies in black roman.

### **RC1 (posted by Anonymous Referee #1 on 25.06.2024)**

*As a developer who is using GT4Py to port parameterized physics, I am encouraged by these performance results as well as the portability across multiple GPU architectures. Overall, I think this is an excellent paper that highlights the potential of DSLs as a forward-looking development platform. I have several questions and comments.*

We are grateful to the Referee for the overall positive feedback and many valuable comments. We find it particularly rewarding that another GT4Py user appreciates our work. In the following, we address each of the points raised by the Referee individually.

- 1. Line 191 : This line mentions that "can be differentiated for the vertical boundaries using the interval context manager". As a GT4Py user, it's clear what is being written, but given that "differentiated" has mathematical meanings, it may be better to reword this to avoid confusion.*

The term "differentiated" is indeed overloaded. We will rephrase the sentence in the revised version of the manuscript to avoid any misinterpretation.

- 2. List 1 and 2 : I realized later that the "Code and data availability" section lists the repositories that contain the codes in List 1 and 2. Originally, I had mistakenly searched the ECMWF-iFS Github site for the CLOUDSC and CLOUDSC2 dwarf codes and was wondering why I*

*couldn't find the codes from the list. One suggestion is to mention that the repos for the codes are mentioned later in the "Code and data availability" section.*

To help readers find the correct code repositories, in the revised manuscript we will add a reference to Ubbiali et al. (2024b-d) right in the Introduction.

*3. Line 296 : Can NPROMA be explained further?*

We thank the Referee for touching upon this aspect, which has been raised in other reviews as well. In the revised manuscript, we will shortly mention what NPROMA represents and refer the reader to available literature resources (e.g. Bauer et al., 2020; [doi.org/10.21957/gdit22ulm](https://doi.org/10.21957/gdit22ulm), and Müller et al., 2019; [doi.org/10.5194/gmd-12-4425-2019](https://doi.org/10.5194/gmd-12-4425-2019)) for further details.

*4. Line 307 : To clarify, is the symmetry test timing the sum of the CLOUDSC2TL and CLOUDSCAD timings?*

Yes, within the symmetry test both CLOUDSC2TL and CLOUDSCAD are called and considered in the timings. Conversely, the computation of the column-wise inner products (L10 & L12 in Algorithm 2) and the following validation procedure (L13-23 in Algorithm 2) are switched off when measuring performance.

*5. Line 336 : I'm a bit confused on the virtual GPU explanation. Does this mean that when 1 MPI process is mapped to an MI250X, only half the GPU is executed?*

That is correct: a MI250X GPU consists of two Graphics Compute Dies (GCDs) connected via four AMD Infinity Fabric links but not sharing physical memory and therefore each MPI rank naturally maps to a single GCD of a MI250X GPU.

*6. Question: The Gridtools backend was mentioned as a GT4Py backend (and I think it enables GPU compute), but its results were not presented. Was it because it was slower than the Dace backend?*

Both the GridTools and the DaCe backends of GT4Py enable GPU computing on both NVIDIA and AMD GPUs, offering very similar performance on MeluXina and LUMI. However, we could not compile the CLOUDSC stencil using the GridTools GPU backend on Piz Daint,

presumably because of a bug in CUDA11. We therefore decided to show results for the DaCe GPU backend only, as they were available on all three machines. On the other hand, the GridTools CPU backend was found to be faster than the DaCe CPU backend in all tested scenarios, so that is why we only present performance numbers for GridTools CPU. This is aligned with all the other programming paradigms considered in this study, for which only the fastest variant is taken into account.

## RC2 (posted by Anonymous Referee #2 on 26.06.2024)

*Overall this paper is a useful contribution towards efforts to achieve performance portability and future-proofing of our model codes. Although I have raised some questions about the scientific correctness of the transferred code, these issues are not essential to the main goal of the paper – which is to explain the software aspects.*

We thank the Referee for such a careful revision of the manuscript, leading to many constructive comments, valuable suggestions and useful corrections. We are pleased to read the Referee's appreciation of our work. In the following, we address each of the issues raised by the Referee individually.

### General Comments

- 1. Line 15: 'reduced precision' is referred to throughout the manuscript, but this is specifically 32-bit IEEE (single precision). As GPUs in particular can (and most Fortran compilers in general cannot currently) exploit other floating point models, e.g. 16-bit IEEE or 32-bit float, I think it would be better to be specific about which precision. As a general question I wonder if you are well placed to explore these other floating-point models with GT4Py?*

We agree with the Referee that the term "reduced precision" may be too vague. In the revised manuscript, we will replace "reduced" with "single" and clarify that this refers to the 32-bit IEEE standard.

Although GT4Py does only support 64-bit and 32-bit floats at the moment, it will be pretty straightforward to allow 16-bit floats in the future.

- 2. Line 96: You discuss a motivation for using the particular CLOUDSC schemes is that they are representative of the computational patterns in physical parametrizations. It would be good to be explicit about what those patterns are. In contrast, on line 398, you talk about not all patterns in parametrizations being natively supported. I would suggest part of this discussion should clarify that the patterns under consideration with CLOUDSC are based on the spatial gridded structure (and in the column), while other parametrizations may use 'pseudo-dimensions' such as number of spectral bands, land surface types, or even moments or bins for more complex microphysics*

*schemes. These may then require additional computational motifs and looping structures to extract optimal performance on different hardware.*

We thank the Referee for touching upon this important point. At the time of writing, one important limitation is indeed that multi-dimensional arrays are not supported in a performant manner. While this is not a problem here, it could be for other scenarios (e.g., radiation). Other features GT4Py is currently missing and that could be useful for physics codes include single column abstraction, write (absolute) offsets, and vertical reductions. In the revised version of the article, we will provide further details on this topic in the last paragraph of Section 6.

- 3. Line 139/Algorithm 1: I'm not entirely sure the details of the TaylorTest are necessary for this paper. However, if you wish to keep it in then please could you add some brief inline documentation (as you might with real code) as to what the algorithm is doing at each stage. It is quite a difficult algorithm to read without it.*

To the best of our knowledge, there does not exist any good reference online for the Taylor test, so we would like to keep Algorithm 1. However, we agree with the Referee that the details of the test are not essential for the main purposes of the paper, therefore we decided to move the Algorithm to the Appendix. We will also follow the suggestion of the Referee and add inline documentation to the algorithm.

- 4. Line 188/Figure 2: The example provided here is for the 2D horizontal Laplacian which uses a stencil accessing horizontal neighbouring columns, but no vertical neighbouring grid points. This is the opposite of the microphysics stencil which does not require access to horizontal neighbours, but does require vertical neighbours (due to sedimentation of hydrometeors). Since this paper is specifically applying the method to the latter, it would be best if the example related to that. At the very least, having some text alongside the discussion of Figure 2 to explain this would be helpful.*

We agree with the Referee that the example shown in the code snippet of Fig. 2 does not feature the characteristic access patterns of the microphysics stencils. We will choose a more representative example in the revised manuscript. However, since the GT4Py internal workflow is described in the main body and Fig. 2 is supposed to only be a visual aid, we would avoid congesting the figure with additional text.

5. Line 285: I'm not sure why you use the 'allclose' method to determine if a particular tolerance has been met rather than calculating and reporting the error. That said, my (limited) understanding of the allclose method is that only one of *rtol* and *atol* is sufficient to pass the test. As a result, the other can be made arbitrarily small and still pass the test. E.g.

```
>>> x=1.0 + 0.99e-12
```

```
>>> y=1.0
```

```
>>> np.allclose(y, x, atol=1e-12, rtol=0)
```

True

```
>>> np.allclose(y, x, atol=0, rtol=1e-18)
```

False

```
>>> np.allclose(y, x, atol=1e-12, rtol=1e-18)
```

True

So how did you use this function to arrive at the quoted numbers? (Presumably one would want to use the first two methods demonstrated independently for each tolerance.)

I think it would be more informative to simply provide values of  $\max(\text{abs}(x-y))$  and  $\max(\text{abs}(x-y)/\text{abs}(x))$  (where  $x$  is the reference data and  $y$  is the rewrite).

In the Python community, it is pretty common to use the *isclose* function from Numpy to check whether two numbers  $x$  (reference) and  $y$  are close up to absolute tolerance *atol* and relative tolerance *rtol*:  $\text{isclose}(x, y, \text{atol}, \text{rtol}) = \text{abs}(x - y) < \text{atol} + \text{abs}(x) * \text{rtol}$ . So both tolerance values are employed by the function simultaneously, and the values we report in the text are the smallest ensuring that *isclose* returns *True* on all grid points for all output fields (i.e., further decreasing *atol* or *rtol* would make the validation fail). Hence, we do not think that providing the absolute and relative errors would be an added value for the paper.

6. There seems to be more to investigate here to ensure correctness. The previous comment would go some way to helping with this, but the fact that the relative tolerance remains the same, but the absolute tolerance

*is 2 orders of magnitude larger suggests that the evolution of the experiment has changed. This could be a symptom of perturbation error growth where a small change leads to a different branch of the code being followed. To add some insight into this, it would also be useful to add more detail about the scientific set up of the dwarf being tested - what are the initial conditions and time-stepping - or where is this described?*

Our answer to the previous point should explain why the absolute and relative tolerance can have different orders of magnitude (depending on the magnitude of  $y$ ).

With respect to the Referee's comment about error growth and time-stepping, we would like to point out that the dwarf codes tested in the paper do not involve integration of a complete atmospheric model. The study validates the developed GT4Py versions by reproducing the results of the IFS Fortran microphysics schemes, which represent the established codes for operational weather forecasting. Hence, we ensure the correct execution of the GT4Py codes for CLOUDSC and CLOUDSC2 by direct comparison with the baseline Fortran implementation on the basis of identical input data to produce the same output.. The input represents real data that is serialized from the IFS and which is available on Zenodo (cf. "Code and data availability" section). With regard to CLOUDSC2TL and CLOUDSC2AD, any minimal error in the implementation would have made either the Taylor test or the symmetry tests fail. In addition, we further note that the GT4Py implementation of CLOUDSC has been tested extensively in the context of a full atmospheric model in the meanwhile. Altogether, we are very confident about the correctness of our GT4Py implementations.

*7. Line 291: Was machine epsilon to single precision used in these tests?*

We were actually using double precision machine epsilon. We are very grateful to the Referee for guessing such inconsistency. We will correct the text and we can anticipate that when using single precision epsilon, the symmetry test for the single precision GT4Py implementations succeeds.

*8. Line 355: Could you say how performance engineering would be done with GT4Py? Would this be in the 'Optimizations' step in Figure 2?*

The “Optimizations” step in Fig. 2 enclose all the optimization strategies carried out internally by the GT4Py library. On the user side, performance can be improved by, e.g., fusing statements & stencils, and pruning temporaries. We will mention these aspects in the revised manuscript.

9. *Line 397: As per comment 2 above, it would be good to expand on what other patterns might be needed that aren't natively supported.*

Please see our reply to comment 2.

### **Specific Comments**

1. *Line 17: ‘has become’ should be ‘became’.*

Thank you, we will adapt the text according to the Referee’s suggestion.

2. *Line 56: References for the GungHo dynamical core can be found at <https://doi.org/10.1002/qj.3501> and <https://arxiv.org/abs/2402.13738>.*

We thank the Referee for providing recent references to the GungHo dynamical core. We will update the text accordingly.

3. *Line 103: ‘slightly polished’ could perhaps be a bit more informative. What needed to be done? Was it purely cosmetic?*

The CLOUDSC & CLOUDSC2 dwarfs do not differ substantially from the corresponding original implementations run operationally at ECMWF. The cleaning-up mostly consisted in removing (i) all the IFS-specific infrastructure code (that is not necessary to run the dwarfs stand-alone), (ii) the calculation of budget diagnostics, and (iii) dead codes (which would not be executed anyway). We will briefly touch upon these points in the text.

4. *Line 141: I think there is a missing  $\delta$  in the first inner product.*

We thank the Referee for spotting the error, we will correct the text.

5. *Line 142: ‘hearth’ should be ‘heart’.*

We thank the Referee for spotting the typo, we will correct the text.

6. *Line 180: ‘scientists is exposed’ should be ‘scientists are exposed’.*



We thank the Referee for spotting the typo, we will correct the text.

7. *Line 237: 'it builds' should be 'does it build'.*

Thank you, we will adapt the text according to the Referee's suggestion.

8. *Line 237: It's not clear to me what 'grid-aware' means in this context. Could you be specific?*

We will briefly expand on this aspect in the revised paper. For instance, this includes that all components are instantiated over a ComputationalGrid (cf. Listing 2) which collects information about the underlying (Cartesian) grid, e.g. grid spacings, index spaces.

9. *Line 296: I don't think NPROMA has been defined.*

We thank the Referee for touching upon this aspect, which has been raised in other reviews as well. In the revised manuscript, we will shortly mention what NPROMA represents and refer the reader to available literature resources (e.g., Bauer et al., 2020; [doi.org/10.21957/gdit22ulm](https://doi.org/10.21957/gdit22ulm), and Müller et al., 2019; [doi.org/10.5194/gmd-12-4425-2019](https://doi.org/10.5194/gmd-12-4425-2019)) for further details.

### **RC3 (posted by Anonymous Referee #3 on 24.07.2024)**

*This is an excellent paper expanding the use of domain specific languages (DSLs), and GT4Py specifically, for performance and productivity in numerical weather prediction. To my knowledge this is the first published work on a tangent-linear or adjoint model in GT4Py, and the results are very encouraging. The authors describe their methodology and development process well, which will aid others looking to reproduce this work and apply it to their own models. That said I do have some small questions and comments I would like to raise before publication:*

We would like to express our sincere gratitude to the Referee for reviewing our work so carefully. We are very pleased to read the Referee's general appreciation of this study, and we thank them for the many constructive and valuable comments that we address point-by-point in the following.

#### **Primary points/questions:**

- 1. I don't think it is necessary to define the tangent linear or adjoint operators explicitly, and I'm also not certain that you need to explicitly define the Taylor test either.*

To the best of our knowledge, there does not exist any good reference online for the Taylor test, so we would like to keep Algorithm 1. However, we agree with the Referee that the details of the test are not essential for the main purposes of the paper, therefore we have decided to move the Algorithm to the Appendix.

- 2. Line 247: I would like to see more description of the infrastructure code around the stencil. What does `compile_stencil` look like? Presumably the parent `DiagnosticComponent` class specifies the `__call__` method, which wraps `array_call`, but that would be nice to see explicitly instead of assuming from what is in the paper.*

We are glad to read the Referee's interest in our infrastructure code. However, it is beyond the scope of the paper to describe the infrastructure code in detail, and we think that this pertains more to a technical documentation, rather than a scientific paper. We refer the Reviewer and any interested reader to the source code of ifs-physics-common (<https://github.com/stubbiali/ifs-physics-common>)

and a talk given by the lead author of the paper at the recent PASC24 conference (<https://event.pasc24-conference.org/slots/msa212>).

3. *Line 250: Similarly, the stencil collection decorator is ifs-specific, and I would appreciate more detail about what it does and how.*

Please refer to our reply to the previous point.

4. *Line 265: Why use a GT4Py backend for CPU but a DaCe backend for gpu?*

For each programming paradigm (either in Fortran, C or Python) we only show performance numbers for the fastest variant. Since the GridTools CPU backend is found to be faster than the DaCe CPU backend, we only take into account the former. On the other hand, the GridTools GPU and DaCe GPU backends offer very similar performance on MeluXina and LUMI. However, we could not compile the CLOUDSC stencil using the GridTools GPU backend on Piz Daint, presumably because of a bug in CUDA11. We therefore decided to show results for the DaCe GPU backend only, as they were available on all three machines.

5. *Line 345: Is the goal of the GT4Py or ECMWF teams to achieve the same performance as native Fortran and CUDA models, or is it to attain most of their performance alongside the benefits of portability and productivity?*

We aim for productivity and portability while achieving competitive performance on both GPU and CPU. Since the DSL can accommodate any specific low-level optimization, attaining the same performance as native Fortran and CUDA models is feasible and will be the target of our future efforts.

6. *Figures 3-5: I'm not convinced by the layout of these figures. Because there are fewer implementations of CLOUDSC2 (and none in 32-bit aside from GT4Py) it may be more natural to report these performance results in a table, or to remove the space for the missing data, especially panels e and f which look disconcertingly sparse. On the other hand this is a very striking way to draw attention to the fact that GT4Py gives you 64- and 32-bit versions of the model in one go, but if you want to emphasize that I would like to see it more explicitly highlighted in the text.*

We are glad to read that the Referee finds the layout of Figs. 3-5 a striking way to emphasize the enhanced portability and flexibility of GT4Py codes. This is indeed our goal, therefore we would prefer to keep the figures as they are. We will carefully review the text to see whether and where we could further highlight the benefits provided by GT4Py.

**Minor:**

1. *In your introduction is it worthwhile to discuss efforts to use tools like Numba or Cython to accelerate numerical models written in Python across various fields of science, such as Augier et al. (doi:10.1038/s41550-021-01342-y) or others?*

We thank the Referee for the meaningful suggestion. However, we note that it is beyond the scope of the paper to discuss how to accelerate Python codes in general. We believe that the Introduction is already very comprehensive.

2. *Line 18: the authors describe Fortran's "functional programming style" which is slightly imprecise; while Fortran uses functions and subroutines, functional programming refers to a style of programming using only pure functions, so no values are updated in-place, which is not how Fortran operates.*

We thank the Referee for this clarification, which we agree with. We will take it into consideration in the revision process.

3. *Line 177: It would be useful to acknowledge contributions from groups beyond the Allen Institute, since they have ceased their work on GT4Py.*

Only major partners of ETH Zurich are mentioned; the only exception is the Allen Institute for Artificial Intelligence (AI2), for their significant contributions to GT4Py.Cartesian.

4. *Line 190: "GTScript abstracts spatial for-loops away" would be more accurate than stating it abstracts for-loops entirely.*

Thank you, we will adapt the text according to the Referee's suggestion.

5. *Line 237: "Not only it builds upon Sympl, but it also extends it" should be "Not only does it build upon Sympl, but also extends it".*

Thank you, we will adapt the text following the Referee's suggestion.

6. *Figure 6: Because the relevant information is contained within the top ~10% of the plot it may be useful to change the y-axis to instead range from 0.8 to 1.0.*

Although we understand the point made by the Referee, we find the plots in Fig. 6 to be more informative if the full bars are shown, so that one can better appreciate the fraction of the total runtime spent on the Python side.

7. *Listing 1: Should foefalcu be "foealpha"?*

We thank the Referee for spotting the typo, we will correct the text.

#### **Other comments:**

1. *Line 323: The fact that the GT4Py implementations of the tangent-linear and adjoint formulations of CLOUDSC2 are the first to enable GPU execution at any precision is very cool and could be emphasized more heavily throughout the paper, in my opinion.*

We are grateful to the Referee for acknowledging and appreciating our work. However, we would like to point out that the primary purpose of the paper is to show the effectiveness of the DSL approach (and in particular GT4Py) for the NWP domain, with respect to productivity, portability, and GPU performance. We believe the robustness of the GT4Py approach, including with respect to the TL/AD codes and single precision, becomes very clear from the current version of the manuscript.

2. *Line 361: It might be worth mentioning that the Python overhead would still account for around 1% of CPU runtime even if the GT4Py CPU performance was on par with Fortran.*

We thank the Referee for this consideration, which we will take into account in the revised manuscript.
